# Supplementary material for: The ATM Ser49Cys Variant Effects ATM Function as a Regulator of Oncogene-Induced Senescence
Source: MDPI journal article supplement (doi:10.3390/ijms25031664), 2024-01-29
Supplement: s1 [file s1]

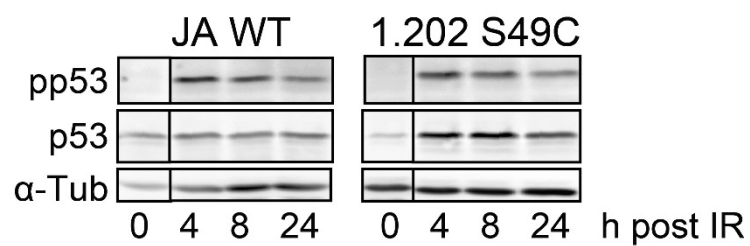

**Supplementary Figure S1:** The indicated LCLs were irradiated with 6 Gy IR then harvested at the indicated times. Whole cell lysates were immunoblotted for pp53, total p53 and  $\alpha$ -tubulin ( $\alpha$ -Tub) as a loading control.

**A**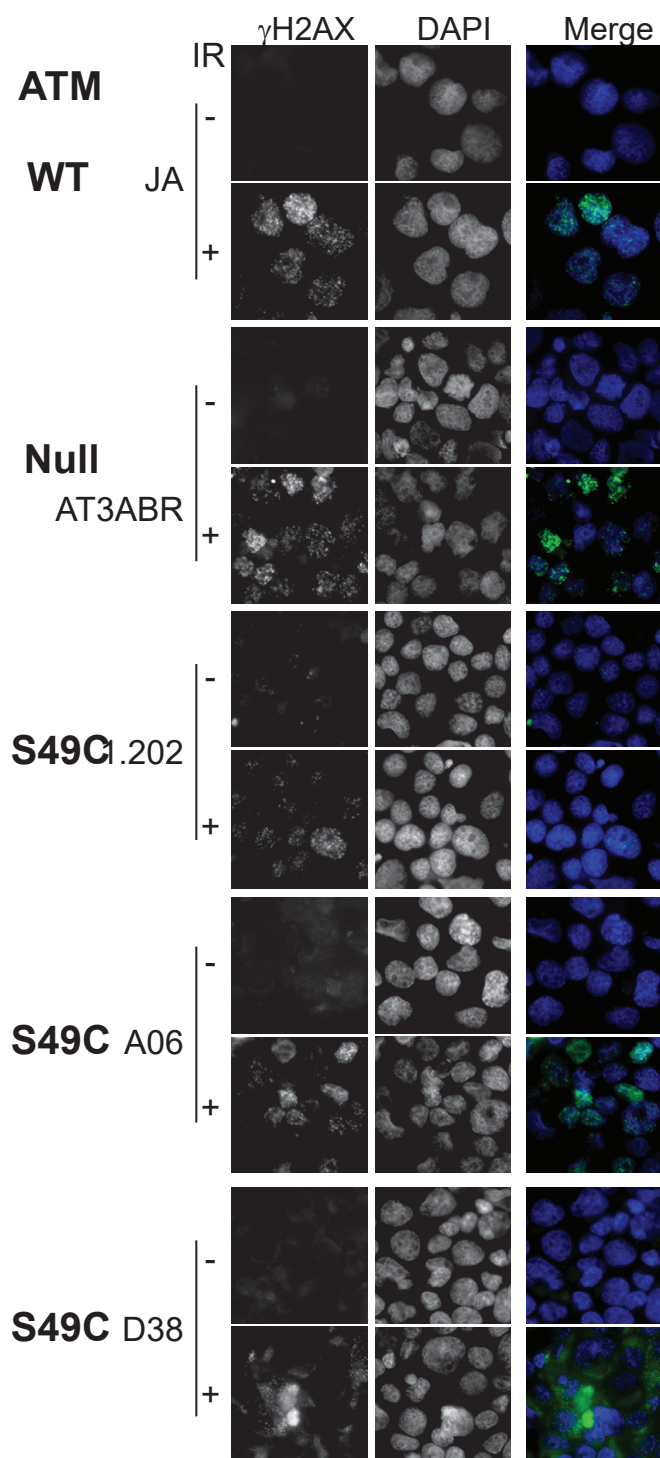**B**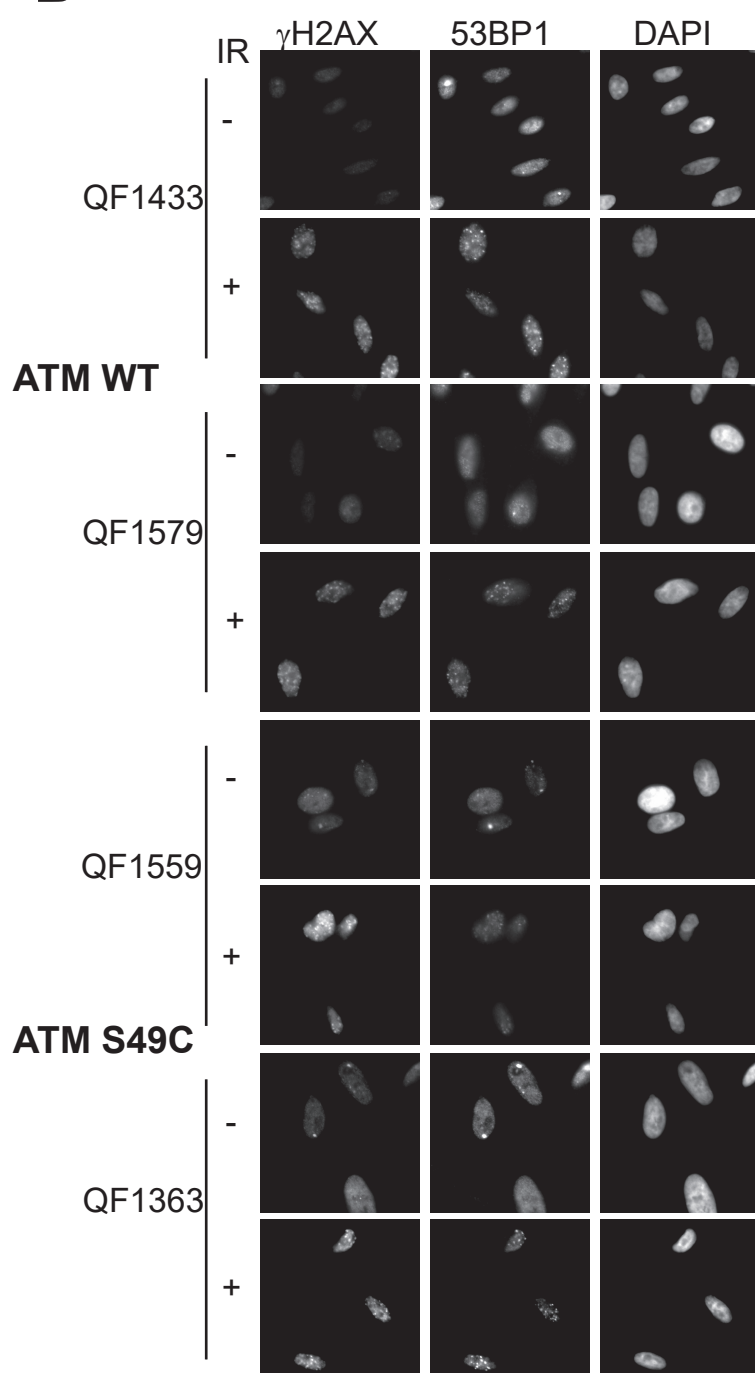

**Supplementary Figure S2:** Immunofluorescence staining of LCL (A) and melanoblast (B) cell lines. Cells were fixed 2 h with or without irradiation (6 Gy), and probed for  $\gamma$ H2AX and 53BP1. DAPI stained the DNA.

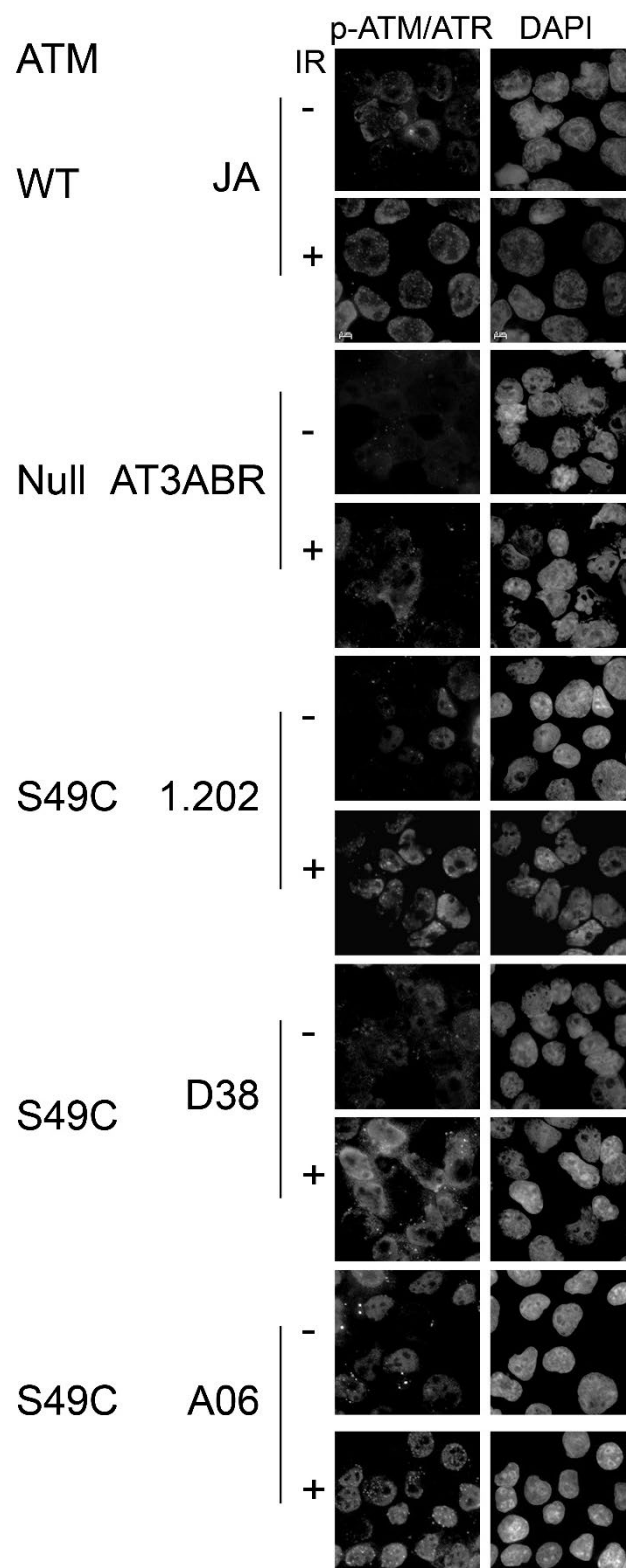

**Supplementary Figure S3:** Immunofluorescence staining of LCL lines. Cells were fixed 2 h with or without irradiation (6 Gy), and probed with the pATM/ATR substrate antibody, and DAPI for the DNA.

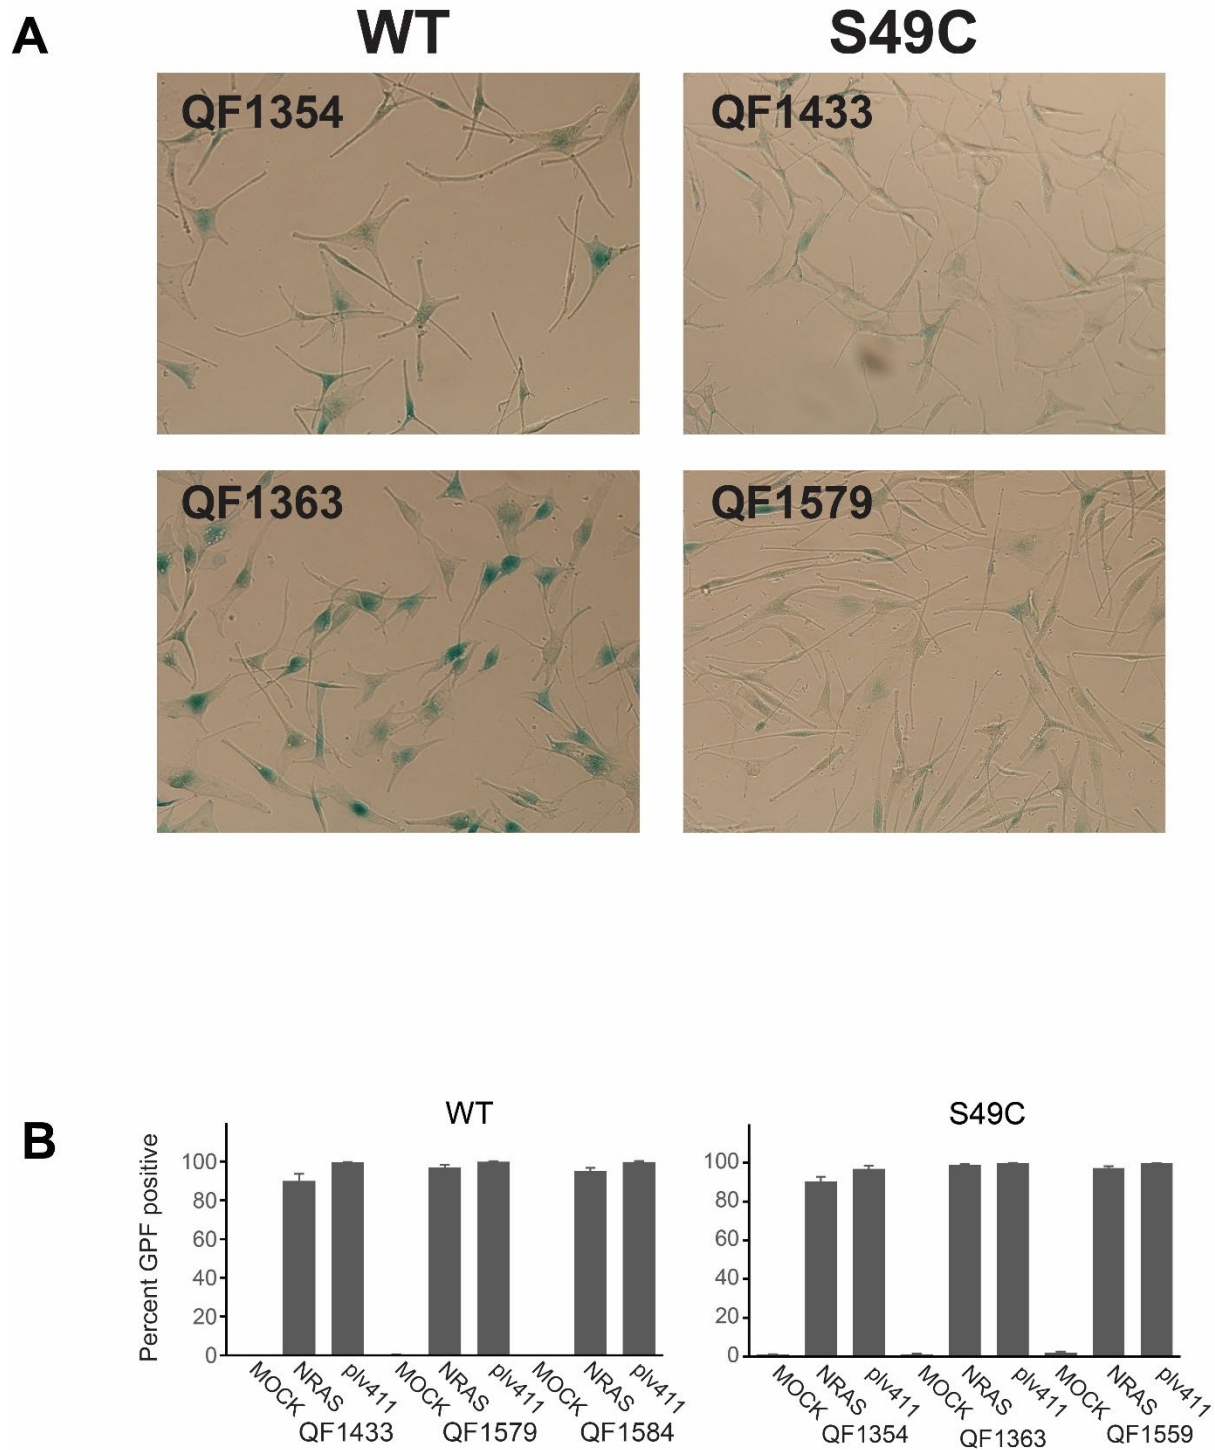

**Supplementary Figure 4:** A) Images of the indicated melanoblast lines 2 weeks after transduction with empty vector and stained for SA- $\beta$ -Gal. B) High content image analysis of melanoblasts transduced with either empty vector (pLV411), NRAS Q61K or mock transduced for 2 weeks. The percentage of GFP expressing cells are shown. This is the average and SD counting 100 - 3400 cells per well of 6 wells.

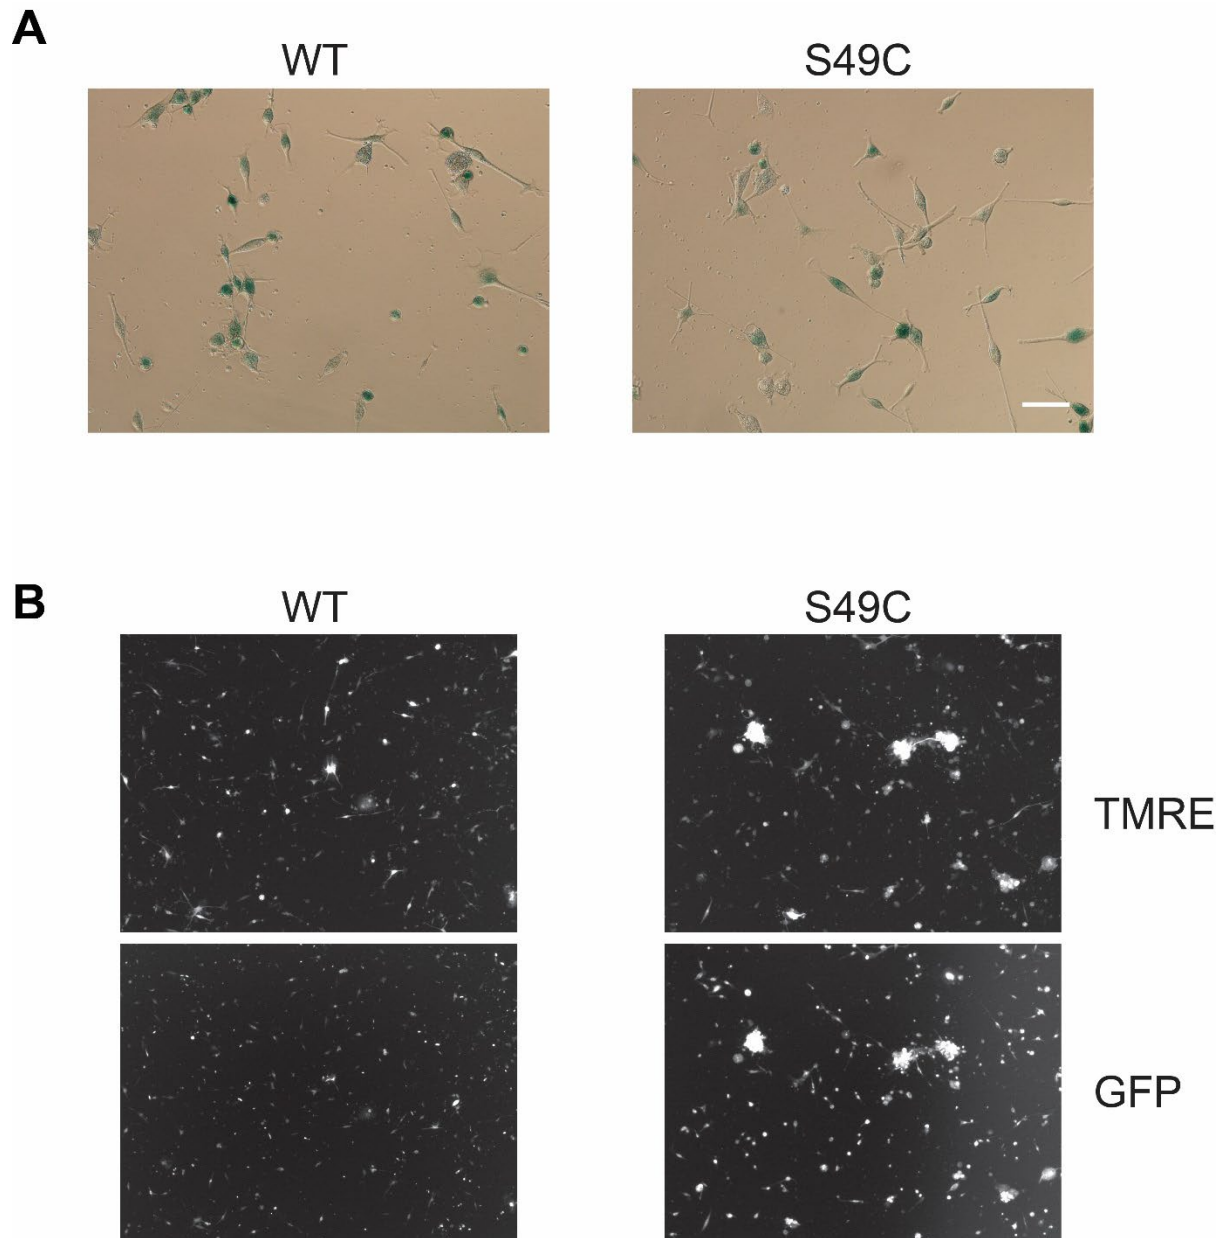

**Supplementary Figure S5:** A) Images of the indicated melanoblast lines 2 weeks after transduction with empty vector and stained for SA- $\beta$ -Gal. B) Fluorescence imaging of the same cells as in Figure 5D but for GFP to identify the transduced cells and TMRE fluorescence for mitochondrial viability.

Supplementary Table S1: ATM Genotype of LCLs

| <b>LCL</b> | <b>ATM</b> | <b>Mutation</b> | <b>State</b> | <b>Protein</b> |
|------------|------------|-----------------|--------------|----------------|
| JA         | WT         |                 | hom          | WT             |
| AT3ABR     | ATM null   | A8266T          | het/-        | K2756X         |
| Col 1.201* | WT         |                 | hom          | WT             |
| Col 1.202* | Variant    | C146G           | het          | S49C           |
| A06        | Variant    | C146G           | het          | S49C           |
| D38        | Variant    | C146G           | het          | S49C           |

\* These LCL lines were derived from unaffected relatives of the proband of the melanoma and astrocytoma affected family [15] and genotyped as described in the Materials and Methods.

Supplementary Table S2: ATM Genotype of melanoblast lines used.

| <b>QF #</b> | <b>MC1R</b> | <b>S49C</b> |
|-------------|-------------|-------------|
| 1433        | WT          | S/S         |
| 1579        | WT          | S/S         |
| 1584        | WT          | S/S         |
| 1363        | D84E +/-    | S/C         |
| 1354        | R163Q +/-   | S/C         |
| 1559        | WT          | S/C         |
